# Supplementary material for: Efficient capture of uranium by a hydroxyapatite-modified polyethyleneimine@carbon nanotube composite from radioactive nuclear waste
Source: Royal Society of Chemistry journal article supplement (doi:10.1039/d3dt01810e), 2023-01-01
Supplement: d3dt01810e1.pdf [file d3dt01810e1.pdf]

Efficient capture of uranium by hydroxyapatite-modified polyethyleneimine@carbon  
nanotube composite from radioactive nuclear waste

Debin Ji,<sup>a,\*</sup> Yue Wang,<sup>a</sup> Yao Liu,<sup>a</sup> Shaoxian Hao,<sup>a</sup> Jialiang Yang,<sup>a</sup> Yongde Yan,<sup>b,\*</sup>

Congying Lu,<sup>c</sup> Shuxia Guan,<sup>a</sup> Qinghe Gao,<sup>c</sup> Hongjun Wu<sup>a</sup>

<sup>a</sup> *College of Chemistry and Chemical Engineering, Northeast Petroleum University, Daqing 163318, P. R. China*

<sup>b</sup> *Yantai Research Institute & Graduate School, Harbin Engineering University, Yantai 264006, P. R. China*

<sup>c</sup> *Heilongjiang Provincial Key Laboratory of Oilfield Applied Chemistry and Technology, Daqing Normal University, Daqing 163712, P. R. China*

\*Corresponding author.

Email: [jidebin900302@163.com](mailto:jidebin900302@163.com) (D. B. Ji)

Email: [y5d2006@hrbeu.edu.cn](mailto:y5d2006@hrbeu.edu.cn) (Y. D. Yan)

NUMBER OF PAGES: 4

NUMBER OF FIGURES: 2

NUMBER OF TABLES: 1

## Contents

### Batch adsorption experiments

XRD pattern of CNT-COOH and CNT-PEI.....**Fig. S1**

The effect of contact time of CNT-PLDH<sub>ad-U, pH=7</sub>.....**Fig. S2**

Fitting parameters.....**Table. S1**

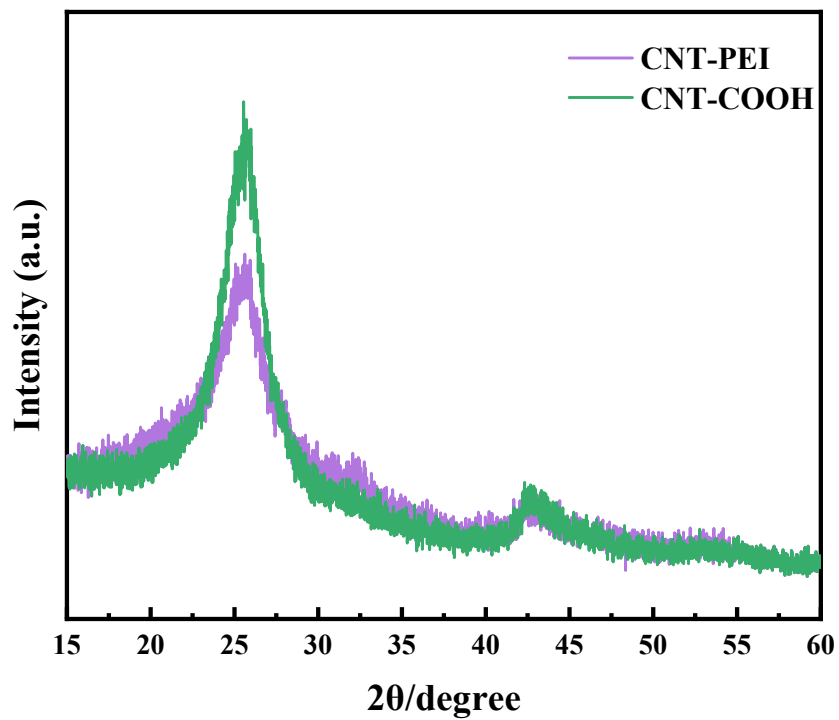

Fig. S1 The XRD pattern of CNT-COOH and CNT-PEI.

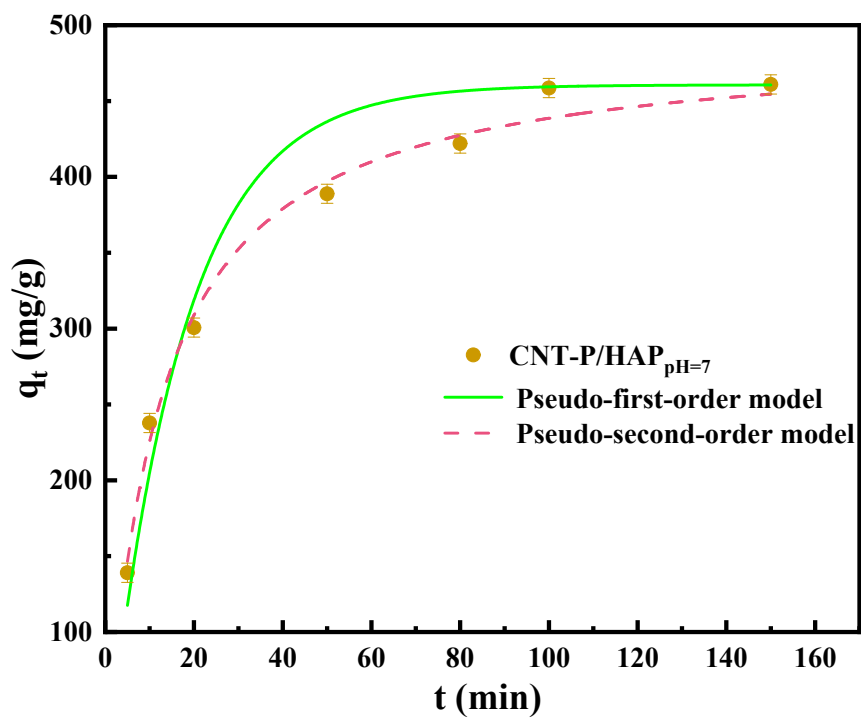

Fig. S2 Influence of the contact time on the adsorption capacity and fitting of the pseudo-first-order and pseudo-second-order kinetic models.

( $M_{\text{CNT-P/HAP}} = 0.005$  g,  $V = 30$  mL,  $\text{pH} = 7$ ,  $T = 298$  K,  $C_0 = 100$  mg/L,  $t = 5 \sim 150$  min)

Table S1 Kinetic fit parameters of CNT-P/HAP

( $M_{\text{CNT-P/HAP}} = 0.005$  g,  $V = 30$  mL,  $\text{pH} = 7$ ,  $T = 298$  K,  $C_0 = 100$  mg/L,  $t = 5 \sim 150$  min).

| Kinetic model                     | $q_e(\text{mg-U/g-ads})$ | $k_1(\text{min}^{-1})/k_2(\text{g/mg}\cdot\text{min})$ | $R^2$  |
|-----------------------------------|--------------------------|--------------------------------------------------------|--------|
| pseudo-first-order kinetic model  | 460.6                    | 0.05891                                                | 0.9409 |
| pseudo-second-order kinetic model | 647.3                    | $1.739 \times 10^{-4}$                                 | 0.9911 |
